# Supplementary material for: Comparison of NF-κB from the protists Capsaspora owczarzaki and Acanthoeca spectabilis reveals extensive evolutionary diversification of this transcription factor
Source: PubMed Central journal article supplement (PMC8677719; doi:10.1038/s42003-021-02924-2), 2021-12-16
Supplement: 42003_2021_2924_MOESM2_ESM.pdf [file 42003_2021_2924_MOESM2_ESM.pdf]

## Description of Additional Supplementary Files

**File name:** Supplementary Data 1.

**Description:** Protein Binding Microarray data from ref (24). Each value is a Z-score for the indicated probe and protein. The sequences most similar to the kappaB site EMSA probe are listed on the right.

**File name:** Supplementary Data 2.

**Description:** Sheet 1 is all 1348 genes that are expressed in the same way as NF- $\kappa$ B across the three life stages of *Capsaspora*. Sheet 2 lists the 389 annotated genes from the 1348 genes shown in sheet 1, and their corresponding UniProt IDs.

**File name:** Supplementary Data 3.

**Description:** PBM-generated Co-NF- $\kappa$ B motif search results (Sheet 2) from MEME-FIMO and total Co-NF- $\kappa$ B motif sites (Sheet 3). Also a list of the 500 bp Page 7 of 21 upstream sequences of the 1348 genes that express in the same pattern as NF- $\kappa$ B over the three life stages (Sheet 4).

**File name:** Supplementary Data 4.

**Description:** RHD sequences of organisms used for Maximum Likelihood phylogenetic analysis.

**File name:** Supplementary Data 5.

**Description:** Supplementary Data 5. Raw data for information in Figs. 2e, 2f, 5c, 6e, and 6f.
